# Supplementary material
Source: PubMed Central journal article supplement (PMC1534125)

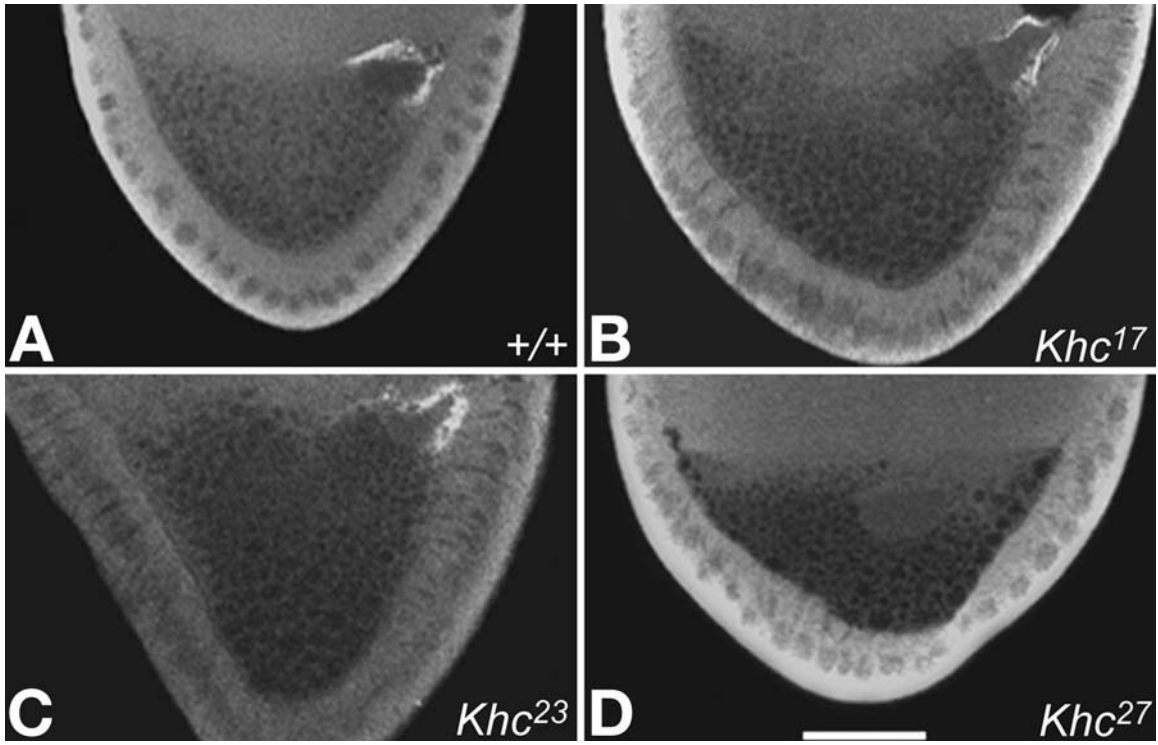

Supplement: NIHMS11364-supplement-FigS1.pdf [file NIHMS11364-supplement-FigS1.pdf]

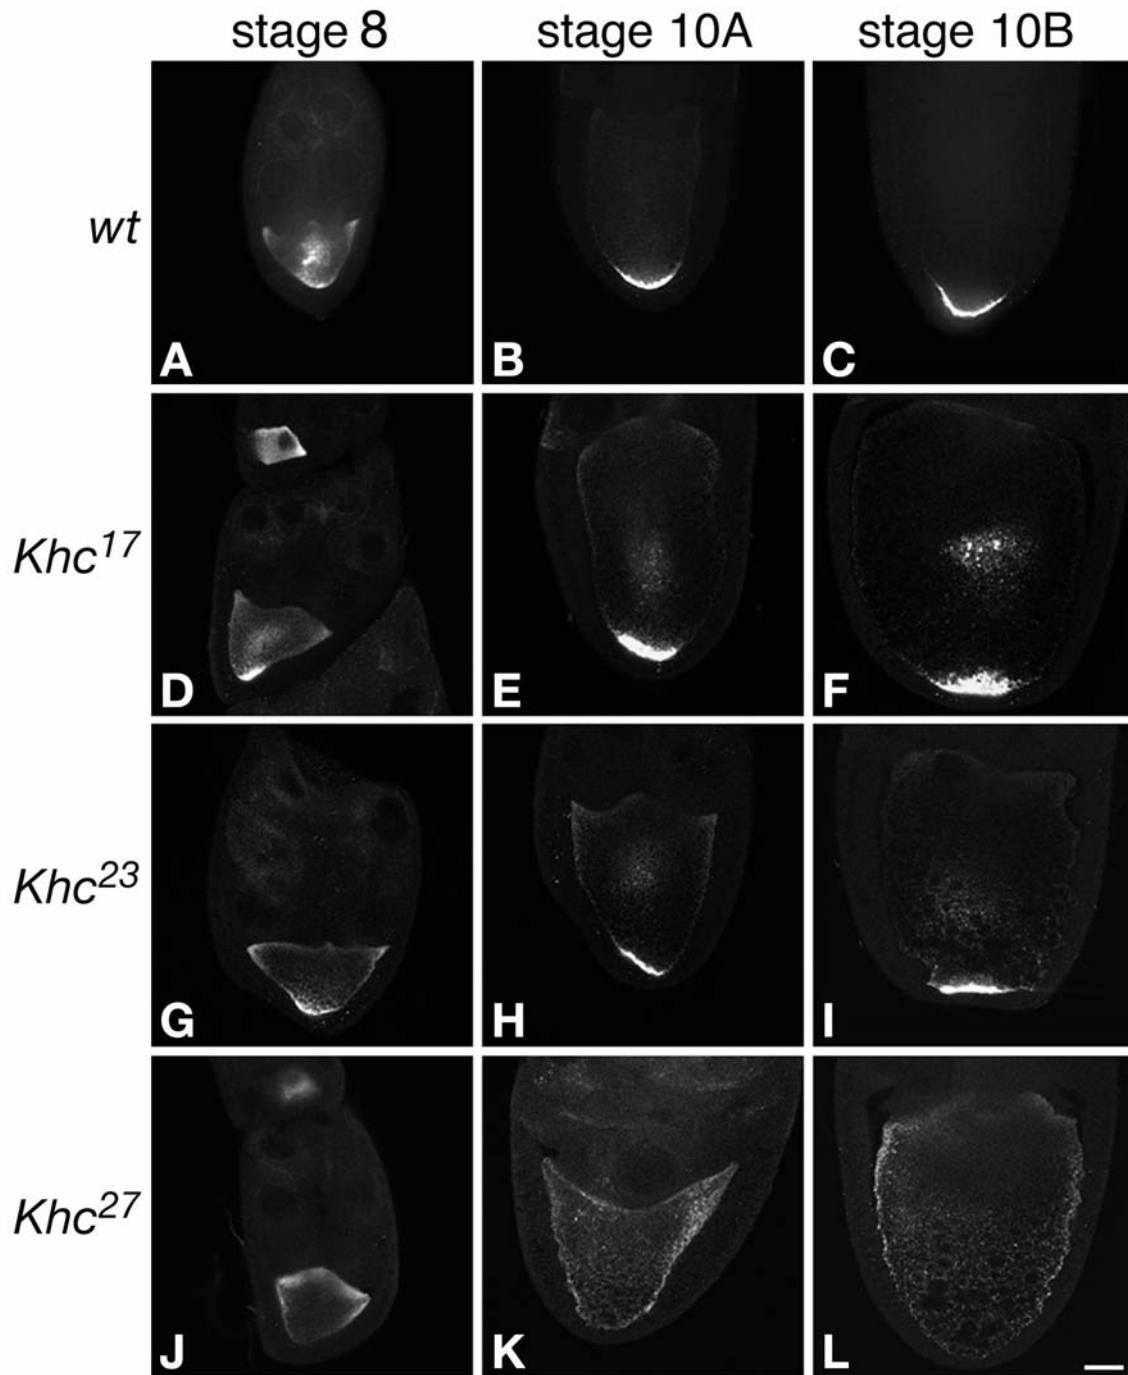

Supplement: NIHMS11364-supplement-FigS2.pdf [file NIHMS11364-supplement-FigS2.pdf]
